# Supplementary material for: NiVEst study: Dimensions of stigma and quality of life in people living with HIV
Source: Research Square preprint supplement (doi:10.21203/rs.3.rs-6775249/v1), 2025-06-23
Supplement: Supplementary file 1 [file 7eb9eae548a4182416a68968.docx]

**Supplementary material**

|  |  | Total QoL | Independence QoL | Spirituality QoL | Physical QoL | General QoL | Psychological QoL | Social QoL | Environmental QoL |
| --- | --- | --- | --- | --- | --- | --- | --- | --- | --- |
| Internalised Stigma | Correlation | -0.36 p<0.001 | -0.22 p=0.0092 | -0.51 p<0.001 | -0.27 p=0.0017 | -0.28 p<0.001 | -0.35 p<0.001 | -0.29 p<0.001 | -0.22 p=0.01 |
| β Unadjusted | -0.89 [-1.22; -0.57] p<0.001 | -0.08 [-0.14; -0.03] p=0.002 | -0.22 [-0.28; -0.16] p<0.001 | -0.11 [-0.16; -0.05] p<0.001 | -0.06 [-0.09; -0.03] p<0.001 | -0.17 [-0.23; -0.1] p<0.001 | -0.13 [-0.18; -0.07] p<0.001 | -0.13 [-0.22; -0.05] p=0.0021 |
| β Adjusted | -0.89 [-1.27; -0.52] p<0.001 | -0.08 [-0.15; -0.02] p=0.011 | -0.22 [-0.28; -0.16] p<0.001 | -0.1 [-0.17; -0.04] p=0.0014 | -0.06 [-0.1; -0.02] p=0.0064 | -0.17 [-0.24; -0.1] p<0.001 | -0.11 [-0.17; -0.04] p=0.0021 | -0.11 [-0.21; -0.02] p=0.017 |
| Negative Self-Image | Correlation | -0.48 p<0.001 | -0.35 p<0.001 | -0.45 p<0.001 | -0.36 p<0.001 | -0.42 p<0.001 | -0.44 p<0.001 | -0.4 p<0.001 | -0.4 p<0.001 |
| β Unadjusted | -2 [-2.53; -1.46] p<0.001 | -0.22 [-0.31; -0.13] p<0.001 | -0.37 [-0.47; -0.27] p<0.001 | -0.24 [-0.33; -0.14] p<0.001 | -0.15 [-0.2; -0.09] p<0.001 | -0.36 [-0.46; -0.25] p<0.001 | -0.29 [-0.38; -0.2] p<0.001 | -0.37 [-0.51; -0.23] p<0.001 |
| β Adjusted | -1.87 [-2.53; -1.21] p<0.001 | -0.21 [-0.32; -0.1] p<0.001 | -0.37 [-0.47; -0.27] p<0.001 | -0.23 [-0.34; -0.12] p<0.001 | -0.13 [-0.21; -0.06] p<0.001 | -0.34 [-0.46; -0.23] p<0.001 | -0.22 [-0.34; -0.1] p<0.001 | -0.28 [-0.45; -0.12] p=0.001 |
| Disclosure Concerns | Correlation | -0.21 p=0.014 | -0.08 p=0.32 | -0.46 p<0.001 | -0.14 p=0.1 | -0.12 p=0.16 | -0.22 p=0.009 | -0.19 p=0.03 | -0.05 p=0.53 |
| β Unadjusted | -0.74 [-1.33; -0.14] p=0.015 | -0.03 [-0.13; 0.06] p=0.49 | -0.29 [-0.4; -0.19] p<0.001 | -0.09 [-0.19; 0.01] p=0.076 | -0.04 [-0.1; 0.02] p=0.15 | -0.15 [-0.26; -0.03] p=0.012 | -0.09 [-0.19; 0.01] p=0.063 | -0.04 [-0.19; 0.11] p=0.57 |
| β Adjusted | -0.96 [-1.65; -0.28] p=0.0067 | -0.06 [-0.16; 0.05] p=0.32 | -0.29 [-0.4; -0.19] p<0.001 | -0.1 [-0.2; 0.01] p=0.07 | -0.05 [-0.12; 0.02] p=0.16 | -0.17 [-0.29; -0.05] p=0.0047 | -0.12 [-0.23; 0] p=0.048 | -0.09 [-0.25; 0.07] p=0.29 |
| Externalised Stigma | Correlation | -0.51 p<0.001 | -0.38 p<0.001 | -0.46 p<0.001 | -0.44 p<0.001 | -0.4 p<0.001 | -0.4 p<0.001 | -0.44 p<0.001 | -0.47 p<0.001 |
| β Unadjusted | -1.41 [-1.76; -1.06] p<0.001 | -0.16 [-0.22; -0.1] p<0.001 | -0.24 [-0.31; -0.17] p<0.001 | -0.2 [-0.26; -0.14] p<0.001 | -0.1 [-0.13; -0.06] p<0.001 | -0.21 [-0.29; -0.14] p<0.001 | -0.2 [-0.26; -0.14] p<0.001 | -0.29 [-0.38; -0.2] p<0.001 |
| β Adjusted | -1.02 [-1.49; -0.56] p<0.001 | -0.11 [-0.18; -0.04] p=0.003 | -0.24 [-0.31; -0.17] p<0.001 | -0.16 [-0.23; -0.08] p<0.001 | -0.05 [-0.1; 0] p=0.059 | -0.15 [-0.24; -0.07] p<0.001 | -0.14 [-0.22; -0.06] p<0.001 | -0.15 [-0.26; -0.04] p=0.0079 |
| Perceived External Stigma | Correlation | -0.52 p<0.001 | -0.42 p<0.001 | -0.44 p<0.001 | -0.44 p<0.001 | -0.42 p<0.001 | -0.44 p<0.001 | -0.44 p<0.001 | -0.48 p<0.001 |
| β Unadjusted | -1.9 [-2.35; -1.45] p<0.001 | -0.22 [-0.3; -0.15] p<0.001 | -0.3 [-0.39; -0.21] p<0.001 | -0.27 [-0.35; -0.2] p<0.001 | -0.14 [-0.18; -0.09] p<0.001 | -0.3 [-0.39; -0.2] p<0.001 | -0.27 [-0.35; -0.2] p<0.001 | -0.4 [-0.51; -0.28] p<0.001 |
| β Adjusted | -1.36 [-1.99; -0.74] p<0.001 | -0.16 [-0.25; -0.07] p=0.001 | -0.3 [-0.39; -0.21] p<0.001 | -0.21 [-0.31; -0.11] p<0.001 | -0.07 [-0.14; -0.01] p=0.035 | -0.23 [-0.33; -0.12] p<0.001 | -0.19 [-0.3; -0.08] p<0.001 | -0.2 [-0.35; -0.05] p=0.0085 |
| Concerns About Public Attitudes | Correlation | -0.3 p<0.001 | -0.17 p=0.05 | -0.36 p<0.001 | -0.27 p=0.0014 | -0.22 p=0.01 | -0.2 p=0.017 | -0.26 p=0.0025 | -0.27 p=0.0017 |
| β Unadjusted | -2.22 [-3.32; -1.12] p<0.001 | -0.2 [-0.37; -0.02] p=0.028 | -0.49 [-0.69; -0.28] p<0.001 | -0.33 [-0.51; -0.15] p<0.001 | -0.15 [-0.25; -0.04] p=0.006 | -0.3 [-0.51; -0.08] p=0.0085 | -0.32 [-0.5; -0.13] p<0.001 | -0.44 [-0.72; -0.17] p=0.0019 |
| β Adjusted | -1.7 [-2.96; -0.44] p=0.0092 | -0.13 [-0.33; 0.07] p=0.21 | -0.49 [-0.69; -0.28] p<0.001 | -0.21 [-0.41; -0.01] p=0.036 | -0.05 [-0.19; 0.08] p=0.41 | -0.13 [-0.35; 0.09] p=0.24 | -0.23 [-0.44; -0.02] p=0.035 | -0.25 [-0.54; 0.03] p=0.084 |
| Total Stigma | Correlation | -0.47 p<0.001 | -0.32 p<0.001 | -0.54 p<0.001 | -0.38 p<0.001 | -0.37 p<0.001 | -0.41 p<0.001 | -0.38 p<0.001 | -0.37 p<0.001 |
| β Unadjusted | -0.69 [-0.87; -0.51] p<0.001 | -0.07 [-0.1; -0.04] p<0.001 | -0.14 [-0.18; -0.11] p<0.001 | -0.09 [-0.12; -0.06] p<0.001 | -0.05 [-0.07; -0.03] p<0.001 | -0.12 [-0.15; -0.08] p<0.001 | -0.1 [-0.13; -0.07] p<0.001 | -0.12 [-0.17; -0.08] p<0.001 |
| β Adjusted | -0.59 [-0.81; -0.37] p<0.001 | -0.06 [-0.1; -0.02] p=0.002 | -0.14 [-0.18; -0.11] p<0.001 | -0.08 [-0.12; -0.04] p<0.001 | -0.03 [-0.06; -0.01] p=0.0084 | -0.11 [-0.15; -0.06] p<0.001 | -0.08 [-0.11; -0.04] p<0.001 | -0.08 [-0.14; -0.03] p=0.005 |

Supplementary Table 1: Associations of stigma and subdomains with quality of life and subitems. Spearman&#39;s rho values are shown alongside the betas from linear models, both adjusted and unadjusted.
